# Supplementary material for: Disparities in the Timing of Preoperative Hemodialysis Among Patients With End-Stage Kidney Disease
Source: PubMed Central journal article supplement (PMC10383006; doi:10.1001/jamanetworkopen.2023.26326), 2023-07-28
Supplement: jamanetwopen-e2326326-s002.pdf [file jamanetwopen-e2326326-s002.pdf]

## Data Sharing Statement

Fielding-Singh. Disparities in the Timing of Preoperative Hemodialysis Among Patients With End-Stage Kidney Disease. *JAMA Netw Open*. Published July 28, 2023.

doi:10.1001/jamanetworkopen.2023.26326

### Data

**Data available:** No

### Additional Information

**Explanation for why data not available:** The USRDS Coordinating Center provides data to anyone who submits a qualified request and receives approval by the NIH-NIDDK. However, per our data use agreement with the USRDS we are unable to share the data directly.
